# Supplementary material
Source: MDPI journal article supplement (https://www.mdpi.com/2227-9040/9/9/269)
Supplement: s1 [file s1]

# A Preliminary Study for Tunable Optical Assessment of Exhaled Breath Ammonia Based on Ultrathin Tetrakis(4-sulfophenyl)porphine Nanoassembled Films

Sergiy Korposh <sup>1</sup> and Seung-Woo Lee <sup>2,\*</sup>

**Citation:** Korposh, S.; Lee, S.-W. Tunable Optical Assessment of Exhaled Breath Ammonia Based on Ultrathin Tetrakis(4-sulfophenyl)porphine Nanoassembled Films. *Chemosensors* **2021**, *9*, 269. <https://doi.org/10.3390/chemosensors9090269>

Academic Editor: Antonio Fernandez

Received: 17 July 2021

Accepted: 14 September 2021

Published: 18 September 2021

**Publisher's Note:** MDPI stays neutral with regard to jurisdictional claims in published maps and institutional affiliations.

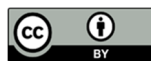

**Copyright:** © 2021 by the authors. Submitted for possible open access publication under the terms and conditions of the Creative Commons Attribution (CC BY) license (<https://creativecommons.org/licenses/by/4.0/>).

<sup>1</sup> Department of Electrical and Electronic Engineering, University of Nottingham, Nottingham NG7 2RD, UK; s.korposh@nottingham.ac.uk

<sup>2</sup> Graduate School of Environmental Engineering, The University of Kitakyushu, 1-1 Hibikino, Kitakyushu 808-0135, Japan

\* Correspondence: leesw@kitakyu-u.ac.jp; Tel.: +81-93-695-3293

**Table S1.** Relationships between the concentrations of NH<sub>4</sub>OH in the solution and the corresponding gas concentrations in the headspace.

| NH <sub>4</sub> OH concentration in solution (ppm) | NH <sub>3</sub> concentration in headspace (ppm) |
|----------------------------------------------------|--------------------------------------------------|
| 1                                                  | 0.2                                              |
| 3                                                  | 0.25                                             |
| 5                                                  | 0.3                                              |
| 7                                                  | 0.5                                              |
| 10                                                 | 1                                                |
| 20                                                 | 3                                                |
| 30                                                 | 4.5                                              |
| 100                                                | 17                                               |
| 200                                                | 50                                               |
| 300                                                | 90                                               |
| 400                                                | 125                                              |
| 500                                                | 140                                              |
| 600                                                | 180                                              |
| 700                                                | 240                                              |
| 800                                                | 290                                              |
| 1000                                               | 360                                              |

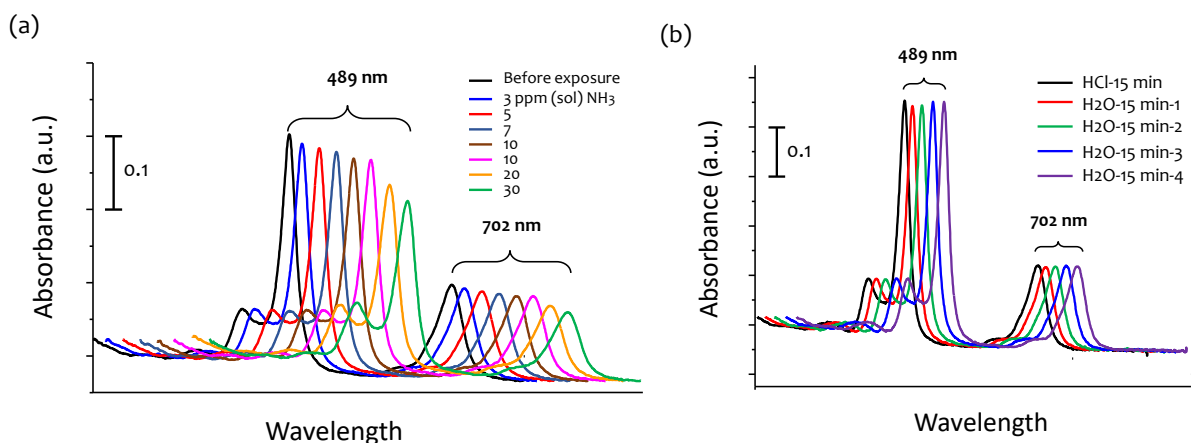

**Figure S1.** UV-vis spectra of the PDDA/TSPP film measured after (a) exposure to ammonia vapors produced by various concentrations of ammonia solutions and (b) continuous exposures to water vapor for 15 min each after HCl vapor treatment. The spectra are shifted horizontally for illustration purposes and convenience in reading the figures.

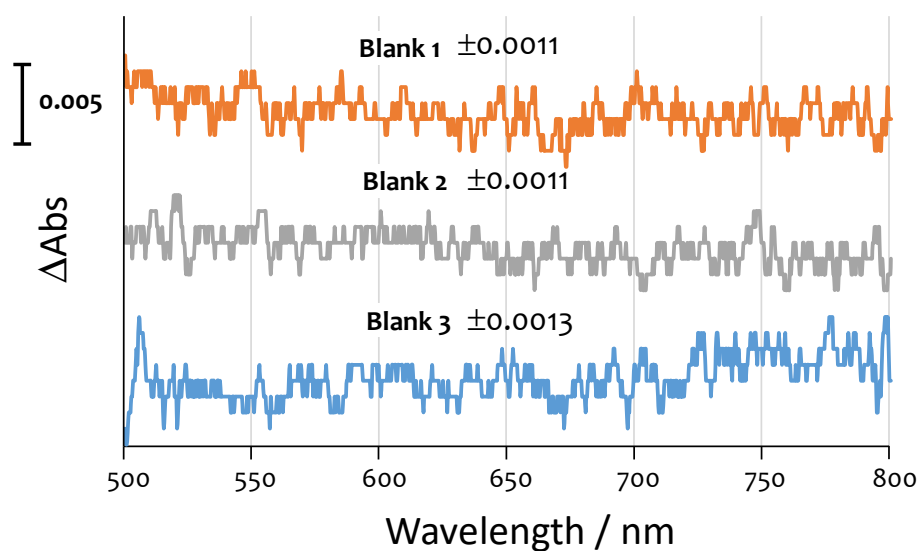

**Figure S2.** Difference absorption spectra of the three blank measurements before exposure to ammonia gas.

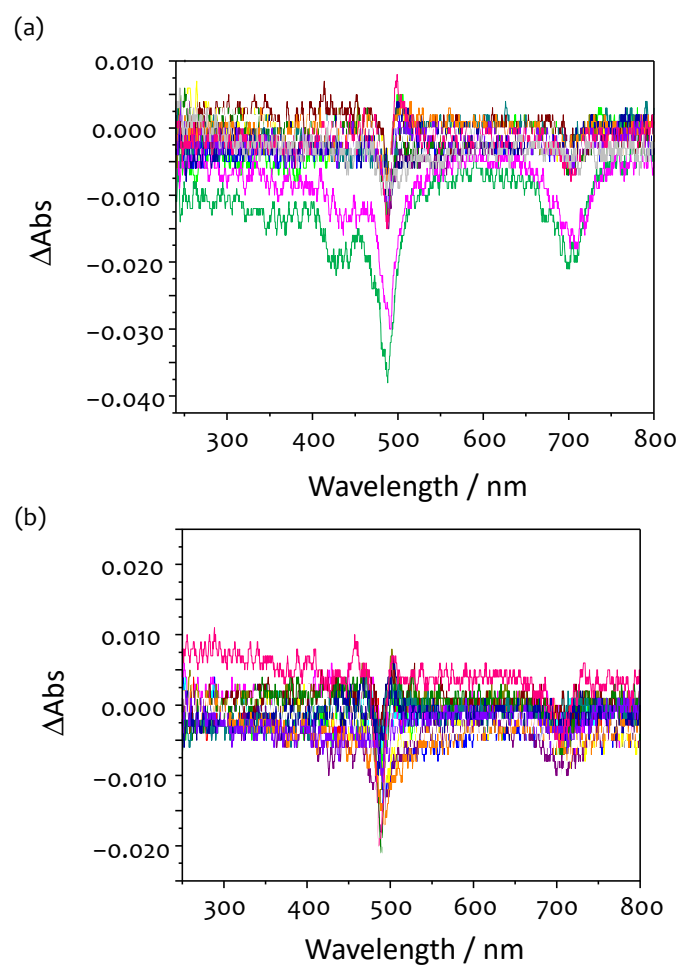

**Figure S3.** Difference absorption spectra of the PDDA/TSPP film measured for the selected breath samples collected from 20 volunteers (a) before lunch and (b) after lunch.
